# Supplementary material for: A composite reference standard is needed for bedaquiline antimicrobial susceptibility testing for Mycobacterium tuberculosis complex
Source: PubMed Central journal article supplement (PMC11237371; doi:10.1183/13993003.00391-2024), 2024-07-11

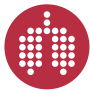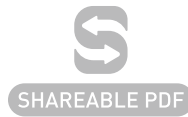

# A composite reference standard is needed for bedaquiline antimicrobial susceptibility testing for *Mycobacterium tuberculosis* complex

Claudio U. Köser <sup>1,20</sup>, Paolo Miotto <sup>2,20</sup>, Nabila Ismail <sup>3</sup>, Richard M. Anthony <sup>4</sup>, Christian Utpatel<sup>5,6</sup>, Matthias Merker <sup>7</sup>, Stefan Niemann <sup>5,6</sup>, Sabira Tahseen <sup>8</sup>, Leen Rigouts<sup>9,10</sup>, Camilla Rodrigues<sup>11</sup>, Shaheed V. Omar <sup>12</sup>, Maha R. Farhat <sup>13,14</sup>, Uladzimir Antonenka<sup>15</sup>, Harald Hoffmann <sup>15,16</sup>, Daniela M. Cirillo <sup>2</sup> and Thomas Schön<sup>17,18,19</sup>

<sup>1</sup>Department of Genetics, University of Cambridge, Cambridge, UK. <sup>2</sup>Emerging Bacterial Pathogens Unit, IRCCS San Raffaele Scientific Institute, Milan, Italy. <sup>3</sup>South African Medical Research Council (SAMRC) Centre for Tuberculosis Research, Division of Molecular Biology and Human Genetics, Faculty of Medicine and Health Sciences, Stellenbosch University, Cape Town, South Africa. <sup>4</sup>National Tuberculosis Reference Laboratory, Centre for Infectious Disease Control, National Institute for Public Health and the Environment (RIVM), Bilthoven, The Netherlands. <sup>5</sup>Molecular and Experimental Mycobacteriology, Research Center Borstel, Borstel, Germany. <sup>6</sup>German Center for Infection Research, Partner site Hamburg-Lübeck-Borstel-Riems, Germany. <sup>7</sup>Evolution of the Resistome, Research Center Borstel, Borstel, Germany. <sup>8</sup>National TB Reference Laboratory, National TB Control Program, Islamabad, Pakistan. <sup>9</sup>Unit of Mycobacteriology, Department of Biomedical Sciences, Institute of Tropical Medicine, Antwerp, Belgium. <sup>10</sup>Department of Biomedical Sciences, University of Antwerp, Antwerp, Belgium. <sup>11</sup>Department of Microbiology, P.D. Hinduja Hospital and Medical Research Centre, Mumbai, India. <sup>12</sup>Centre for Tuberculosis, National TB Reference Laboratory, National Institute for Communicable Diseases, National Health Laboratory Service, Johannesburg, South Africa. <sup>13</sup>Department of Biomedical Informatics, Harvard Medical School, Boston, MA, USA. <sup>14</sup>Pulmonary and Critical Care Medicine, Massachusetts General Hospital, Boston, MA, USA. <sup>15</sup>Institute of Microbiology and Laboratory Medicine, Department IML red GmbH, WHO, Supranational Tuberculosis Reference Laboratory, Gauting, Germany. <sup>16</sup>SYNLAB Gauting, SYNLAB MVZ Dachau GmbH, Munich, Germany. <sup>17</sup>Department of Infectious Diseases, Region Östergötland, Linköping University Hospital, Linköping, Sweden. <sup>18</sup>Division of Infection and Inflammation, Institute of Biomedical and Clinical Sciences, Linköping University, Linköping, Sweden. <sup>19</sup>Department of Infectious Diseases, Kalmar County Hospital, Linköping University, Kalmar, Sweden. <sup>20</sup>Both authors contributed equally.

Corresponding author: Claudio U. Köser ([cuk21@cam.ac.uk](mailto:cuk21@cam.ac.uk))

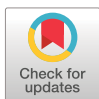

Shareable abstract (@ERSpublications)

**A composite reference standard minimises false-susceptible AST results for bedaquiline**

<https://bit.ly/3wAVvFm>

**Cite this article as:** Köser CU, Miotto P, Ismail N, *et al.* A composite reference standard is needed for bedaquiline antimicrobial susceptibility testing for *Mycobacterium tuberculosis* complex. *Eur Respir J* 2024; 64: 2400391 [DOI: 10.1183/13993003.00391-2024].

This extracted version can be shared freely online.

Copyright ©The authors 2024.

This version is distributed under the terms of the Creative Commons Attribution Licence 4.0.

Received: 29 Feb 2024  
Accepted: 6 May 2024

*To the Editor:*

We echo the latest calls that have been made to increase the capacity for antimicrobial susceptibility testing (AST) for bedaquiline for the *Mycobacterium tuberculosis* complex [1, 2]. However, we would like to highlight the limitations of using insufficiently standardised or validated phenotypic AST methods and breakpoints as the reference standard for bedaquiline AST. Moreover, we advocate for adoption of a composite reference standard that considers genotypic AST results to minimise false-susceptible results for borderline/low-level resistance mechanisms and avoid confusion during clinical decision-making.

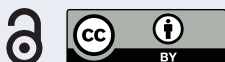

Supplement: ERJ-00391-2024.Shareable.pdf [file ERJ-00391-2024.Shareable.pdf]
